# Supplementary figures and images for: A new way to rapidly create functional, fluorescent fusion proteins: random insertion of GFP with an in vitrotransposition reaction
Source: Springer Nature journal article supplement (doi:10.1186/1471-2202-3-7), 2002-06-19

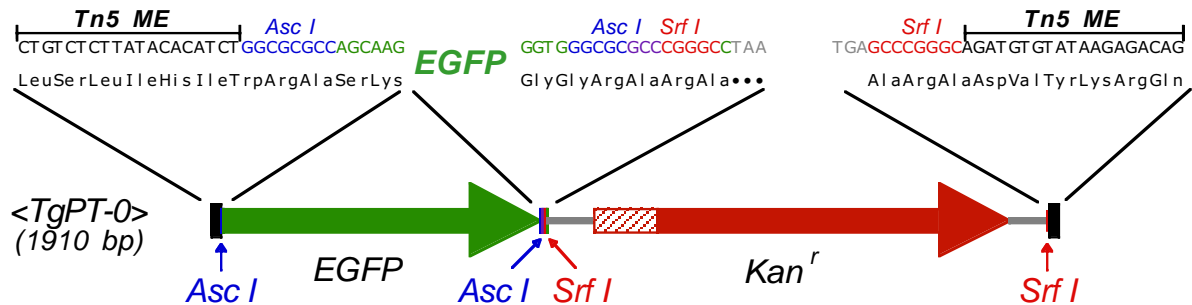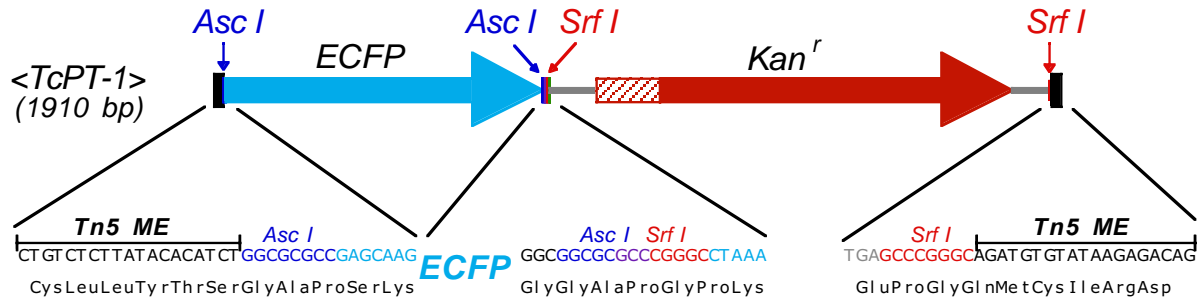

Supplement: Additional file 1 [file 1471-2202-3-7-s1.pdf]
